# **Using remotely delivered Spring Forest Qigong™ to reduce neuropathic pain in adults with spinal cord injury: Protocol of a quasi-experimental clinical trial**

Ann Van de Winckel, PhD, MSPT, PT<sup>1</sup>; Sydney Carpentier, BA<sup>2</sup>; Wei Deng, BS<sup>2</sup>; Lin Zhang, PhD<sup>3</sup>; Ricardo Battaglini, PhD<sup>4</sup>; Leslie Morse, DO<sup>4</sup>

<sup>1</sup> Division of Physical Therapy, Division of Rehabilitation Science, Department of Rehabilitation Medicine, Medical School, University of Minnesota, USA

<sup>2</sup> Division of Rehabilitation Science, Department of Rehabilitation Medicine, Medical School, University of Minnesota, USA

<sup>3</sup> Division of Biostatistics, School of Public Health, University of Minnesota, USA

<sup>4</sup> Department of Rehabilitation Medicine, Medical School, University of Minnesota, USA

**Word count:** 5144

**The number of tables:** 1

**The number of figures:** 2

**Trial registration number (if clinical trial):** ClinicalTrials.gov: NCT04917107

**Grant support or other sources of funding:** This study is internally funded by the Division of Physical Therapy, Department of Rehabilitation Medicine, Medical School, University of Minnesota. The research is supported by the National Institutes of Health's National Center for Advancing Translational Sciences, grant

not necessarily represent the official views of the National Institutes of Health's National Center for Advancing Translational Sciences. The funders have no role in study design, data collection and analysis, decision to publish, or preparation of the manuscript.

**Declarations of any conflicts of interest:** none

**Other disclaimers, if any:** N/A

**Corresponding author:**

Dr. Ann Van de Winckel, PhD, MSPT, PT

Division of Physical Therapy, Division of Rehabilitation Science, Department of Rehabilitation Medicine, Medical School, University of Minnesota, 420 Delaware St SE (MMC 388), Rm 311, Minneapolis, MN 55455; Phone: 612-625-1191; Fax: 612-625-4274; E-mail: [avandewi@umn.edu](mailto:avandewi@umn.edu)

**Acknowledgments**

We thank Master Chunyi Lin, MS, and Master Jaci Gran from the Spring Forest Qigong™ for their consultancy and assistance with providing the content of the 5 Element Qigong Healing Movements protocol. We would like to thank Marc Noël for the critical review of the manuscript.

This study is internally funded by the Division of Physical Therapy, Department of Rehabilitation Medicine, Medical School, University of Minnesota. The research is supported by the National Institutes of Health's National Center for Advancing Translational Sciences, grant UL1TR002494. The content is solely the

responsibility of the authors and does not necessarily represent the official views of the National Institutes of Health's National Center for Advancing Translational Sciences. The funders have no role in study design, data collection and analysis, decision to publish, or preparation of the manuscript.

## **Abstract**

*Background:* About 50% of Americans living with spinal cord injury (SCI) suffer from long-term debilitating neuropathic pain, interfering with quality of daily life. Neuropathic pain is refractory to many available treatments –some carrying a risk for opioid addiction– highlighting an urgent need for new treatments. In this study, we will test our hypothesis that Spring Forest Qigong™ will reduce SCI-related neuropathic pain by improving body awareness. We will determine whether remotely delivered Qigong is feasible and whether it reduces neuropathic pain (primary outcome). We will also determine whether it reduces spasms frequency and/or severity, improves functional performance, mood, or body awareness (secondary outcomes).

*Methods:* In this quasi-experimental study, adults with SCI will practice Qigong at home with a 45min video, at least 3x/week for 12 weeks. The Qigong practice includes movements with guided breathing and is individualized based on functional abilities, i.e., the participants will do kinesthetic imagery of Qigong movements with guided breathing, for movements that they are unable to perform actively. The primary clinical outcome –the highest, average, and lowest neuropathic pain ratings perceived in the prior week– will be recorded weekly throughout the study period. The secondary outcomes will be collected at 4 time points: at baseline, midway during the Qigong intervention (6 weeks), after the Qigong intervention (12 weeks), and after the 6-week follow-up. The data will be analyzed with a repeated measure ANOVA and with Tukey post-hoc tests.

*Discussion:* Successful outcomes will provide promising evidence for remotely delivered Qigong for neuropathic pain and spasm reduction in individuals living with SCI.

**Keywords:** spinal cord injury; neuropathic pain; spasms; function; Qigong; body awareness

**Clinical Trial registration number:** [ClinicalTrials.gov: NCT04917107](https://clinicaltrials.gov/ct2/show/study/NCT04917107)

## ABBREVIATIONS

|          |                                                     |
|----------|-----------------------------------------------------|
| C4       | Cervical vertebrae 4                                |
| COVID-19 | Coronavirus disease 2019                            |
| HIPAA    | Health Insurance Portability and Accountability Act |
| MS       | Master of Science                                   |
| OP1/OP4  | Parts 1 and 4 of the parietal operculum             |
| REDCap   | Research Electronic Data Capture                    |
| SCI      | Spinal cord injury                                  |
| T1       | Thoracic vertebrae 1                                |

## HIGHLIGHTS

- Spinal cord injury-related neuropathic pain is notoriously difficult to treat.
- Qigong is a mind and body approach, accessible for adults with spinal cord injury.
- We will investigate the feasibility of a remotely delivered Qigong intervention.

## 1. Introduction

Approximately 294,000 Americans have a spinal cord injury (SCI).<sup>(1)</sup> Pain is one of the most common secondary conditions of SCI and the most difficult to treat.<sup>(2)</sup> This is especially true for chronic neuropathic pain, which is described as sharp, shooting, stabbing, electric, or burning, and sometimes excruciating pain above, at, or below the level of spinal injury.<sup>(2,3)</sup> About 50% of Americans living with spinal cord injury (SCI) suffer from long-term debilitating neuropathic pain, interfering with general activity, mobility, mood, sleep, and quality of life.<sup>(1,4,5)</sup> Pain can hinder any potential for functional improvement that could be obtained during rehabilitation. Yet, neuropathic pain is refractory to many treatments.<sup>(2)</sup> Current non-surgical interventions, such as medications, neuromodulation, or transcutaneous electrical nerve stimulation aim to alter the pain circuitry by targeting the pain sensation directly, but so far evidence of efficacy is limited and some drug regimens expose individuals to serious side effects (e.g., opioid addiction), highlighting an urgent need for new treatments.

Neuropathic pain in adults with spinal cord injury (SCI) has been attributed to altered pain processing-related brain function.<sup>(6-8)</sup> Due to this alteration, there is a disconnect between the sensory information that the brain is expecting to receive and the interpretation of the missing or incorrect sensory information that the brain actually receives. The brain uses a prediction framework in which predictions of sensory input are compared to actual sensory input. In adults with SCI, the disruption of sensory inflow is compensated for by upregulating the residual sensory inflow (or, in the case of complete injury, spontaneous noise fluctuations). In addition to an increase in sensory

signal, attention and body awareness serve as a sophisticated integrative mechanism that typically adapts well to changes in peripheral signals. However, in adults with SCI, these adaptations can “get stuck” such that the sensory signal is not spontaneously re-calibrated but might give rise to chronic phantom-like percepts. This disconnect leads to altered brain circuitry related to sensory information.<sup>(6,7,9,10)</sup> Because sensory information includes increased pain sensation, the disconnect, in turn, drives the neuropathic pain perception.<sup>(6,7,9,10)</sup> Concurrently, recent studies showed that SCI-related brain alterations impact body awareness in addition to pain perception.<sup>(11–14)</sup>

Mind and body approaches –known for training body awareness– have been shown to reduce chronic pain in populations with chronic pain, such as chronic low back pain and fibromyalgia, but evidence on the effectiveness of mind and body approaches in SCI is limited.<sup>(15–23)</sup> Curtis *et al.* (2017) reported improvements in depressive symptoms and self-compassion, but not in pain, when a group of adults with SCI doing adaptive yoga was compared to a waitlist group.<sup>(22)</sup> Shem *et al.* (2016) reported in a single-arm study that a seated Tai Chi program was well-tolerated in adults with SCI. The authors showed benefits in pain, emotional and physical well-being immediately after each session.<sup>(23)</sup> However, the weekly in-person classes were associated with a drop-out of 60% and the authors only included adults with paraplegia. While these are promising results, more studies are needed.

Qigong –a mind and body approach that incorporates gentle body movements, paired with a focus on breathing and body awareness to promote health and wellness– is accessible for adults with SCI due to the simple, gentle movements, which can be

done in a sitting or lying position or by doing a kinesthetic imagery of the movements when participants are unable to move their limbs.<sup>(18,24)</sup> Practicing Qigong has been recognized to improve posture, body awareness, and emotional balance.<sup>(18)</sup> The fact that some Qigong programs are available online, helps provide access to adults with SCI with limited mobility or who live more rurally in Minnesota or out of State.

In this quasi experimental study, we will test our hypothesis that remotely delivered Five Element Qigong Healing Movements of Spring Forest Qigong™ will reduce SCI-related neuropathic pain by improving body awareness. If our hypothesis is validated, the outcome of our work will be the first step in demonstrating a potentially effective therapy for adults with SCI-related neuropathic pain. To test this hypothesis, we will determine whether 12 weeks of remotely delivered Qigong is feasible and well-tolerated and whether it reduces neuropathic pain in adults with paraplegia or tetraplegia following a SCI. Given the reported associations with pain, we also will assess whether Qigong practice will reduce spasms frequency and/or severity, and improve functional performance, mood, and body awareness as secondary outcomes.

## **2. Methods and design**

### *2.1. Study design*

This is a quasi-experimental pre-post design. Participants with SCI-related neuropathic pain and with paraplegia or tetraplegia will perform 12 weeks of Five Element Qigong Healing Movements of Spring Forest Qigong™ with an online video at home, at least 3x/week, 41 min/session. Participants will receive weekly phone calls during the 12



weeks of Qigong practice to encourage adherence, address questions and demonstrate movements over Zoom if needed. The highest, average, and lowest neuropathic pain ratings perceived in the prior week (primary outcome) will be recorded weekly throughout the whole study period. The secondary outcomes will be collected at 4 time points: at baseline, midway during the Qigong intervention (6 weeks), after the Qigong intervention (12 weeks), and after the 6-week follow-up. The data acquisition will run from July 1, 2021, until May 31, 2022. The study flow chart is presented in **Figure 1**.

## *2.2. Participants*

We plan on recruiting 23 adults with SCI-related neuropathic pain.

### *2.2.1. Inclusion criteria*

We will include adults who are 18–75 years old, with SCI of  $\geq 3$  months, medically stable with paraplegia (T1 and below) or tetraplegia (C4 and below) and a highest level of SCI-related neuropathic pain  $\geq 3$  on the numeric pain rating scale.

### *2.2.2 Biological variables*

We estimate that the average age of our participants will be 43 years old.<sup>(25)</sup> The sex ratio of new SCI cases of men and women is about 4:1 (i.e., 78%).<sup>(2,25)</sup> About 24% of SCI occur among non-Hispanic Blacks, which is higher than the proportion of non-Hispanic Blacks in the general population (13%).<sup>(2,25)</sup> Given the small sample size and the "pilot" character of this study, and the fact that Minnesota has 79.10% non-Hispanic

white population in Minnesota and 7.00% non-Hispanic Blacks,<sup>(26)</sup> we may not be able to investigate the effects of sex or race.

### *2.2.3. Exclusion criteria*

We will exclude adults with uncontrolled seizure disorder; cognitive impairment and/or communicative disability (e.g., due to brain injury) that prevent participants from following directions or from learning; pregnant women; adults with ventilator dependency; or with other major medical complications. We will exclude adults above 75 years of age because of age-related decline in body awareness<sup>(27)</sup> and we wish to investigate body awareness deficits related to SCI, not age.

### *2.3 Ethical considerations and trial registration*

We will adhere to the ethical guidelines of the Declaration of Helsinki. The University of Minnesota's Institutional Review Board (IRB) approved the study (IRB #STUDY00011997). The study is registered at ClinicalTrial.gov: NCT04917107.

### *2.4. Sample size calculation*

To our knowledge, this will be the first study evaluating the feasibility and effects of Qigong on neuropathic pain perception. The primary goal of the study will be to collect pilot data and obtain preliminary estimates of effect size that are crucial to generate hypotheses for a future larger randomized controlled trial. Our sample size is based on the estimated accrual rates obtained from existing data of adults with SCI in Twin Cities clinics. However, we conducted a preliminary power calculation for the given sample

size based on estimates from another body awareness therapy in adults with SCI (currently unpublished). In this prior study, we saw a reduction in neuropathic pain intensity of *at least*  $2.31 \pm 2.07$  points for highest, average, and lowest neuropathic pain in the prior week. Assuming the same standard deviation estimate, a total of 23 participants will have 99% power to detect the same pain reduction of 2.31 points on the numeric pain rating scale (standardized Cohen's  $d = 1.11$ ) with a two-sided significance level of 0.05 using a paired- $t$  test, and 80% power to detect a pain reduction of 1.45 points (Cohen's  $d=0.7$ ) in this study. With an attrition rate of 30%, the planned sample size will still have 80% power to detect a pain reduction of 1.57 points (Cohen's  $d=0.76$ ).

## *2.5. Participant recruitment, sampling design, eConsenting*

### *2.5.1. Recruitment*

Participants will be recruited in outpatient locations within the newly funded Spinal Cord Injury Model System Center (Minnesota Regional Spinal Cord Injury Model System) and in the community. Specifically, we have collaborators within the Minneapolis VA Health Care System including the Minnesota Paralyzed Veterans; University of Minnesota Medical Center, M Health Fairview (Minneapolis MN); MN SCI associations; Regions Hospital; Courage Kenny Rehabilitation Institute; Get Up Stand Up To Cure Paralysis; Unite2fight paralysis, and Fit4Recovery.

In 2019, there were 530 adults with SCI treated in the Twin Cities clinics with 311 receiving outpatient therapy in rehabilitation centers. We will also recruit adults with chronic SCI in the community through the various organizations mentioned above and

through fliers and information on relevant websites. Even with an estimated 30% screening failures based on inclusion and exclusion criteria, we have many opportunities to recruit 23 participants with SCI and neuropathic pain over the course of the study.

### *2.5.2. Sampling design*

We will use volunteer sampling through fliers, and post study-relevant information about this study on social media and relevant websites. We will also use convenience sampling by having the health care providers of the respective hospitals and organizations provide enrollment information and materials to potential participants.

### *2.5.3. eConsenting*

Prior to consenting, eligible participants will have a virtual visit with study staff to review the consent document and ask questions regarding the study. Ample time will be given for decision making. The combined HIPAA/informed eConsent will be signed through a University of Minnesota Research Electronic Data Capture (REDCap) link. REDCap uses a MySQL database via a secure web interface with data checks to ensure data quality during data entry. In case of major changes to the protocol, participants will be asked to sign a new eConsent. Procedures are in place for maintaining the full confidentiality of all information collected. All IRB rules and HIPAA rules protecting the participants' rights and confidentiality of records will be followed.

## *2.6. Qigong intervention*

Qigong Master Chunyi Lin, MS in holistic healing, developed the video “Five Element Qigong Healing Movements”, and guides the participant on the online video through each of the movements. The video includes five gentle horizontal and vertical arm and leg movements performed with guided breathing.<sup>(16,28)</sup> Each of the five movements connects to a specific organ system and a specific element or symbol of nature (Fire, Earth, Metal, Water, and Wood) as defined by Traditional Chinese Medicine. Each element is associated with two meridians, with a specific organ system, and with specific emotions, which have a positive and negative counterpart. When practicing the Five Element Qigong Healing Movements, the focus is directed only on the positive emotions. The movements are depicted in **Figure 2**. The explanation of the five movements, as shown in the online video, are detailed below.<sup>(28)</sup>

*Preparation phase:* The video starts with smiling and focusing on the heart. The participants bounce for one minute with the arms relaxed next to the body, and another minute with the arms in the air. Master Lin then guides the participants through various cupping and tapping movements to open the energy channels related to each of the five organ systems. The preparation phase ends with setting an intention for healing. Then the five movements are performed for 5 minutes each.

*Movement 1: Moving of Yin and Yang.* This movement helps the liver system and is connected to the Wood element. The liver system associates with the emotion of happiness (or its negative counterpart: anger). Movement 1 is performed by using the elbows to have the arms make an elliptical movement. The movement starts by moving

the right hand out and down to the bottom of the torso, while the left hand moves in (closer to the body) and up to the face. While doing this movement, the focus is on the emotion happiness and on the sensations felt in the body. After five minutes of performing this elliptical pattern, the hands are brought down in front of the Lower Dantian, which is an energy center about 3 thumbs width below the navel and 3 thumbs inward. The hands are positioned such that there is a space between the body and the hands and there is a space between both hands. Men will position their left hand in (i.e., closer to the body) and right hand out. Women will position their right hand in and left hand out. The participants focus on the Lower Dantian and take a deep breath three times.

*Movement 2: Breathing of the Universe.* This movement helps the heart system and is connected to the Fire element. The heart system associates with the emotion of joy (or its negative counterpart: hatred). After Movement 1, on the 4<sup>th</sup> breath, the participants inhale, bend the knees and open the hands to the sides. With the exhale, the hands come closer again and the participants straighten the body again. Participants focus on the emotion of joy and on sensations that occur naturally in their body.

*Movement 3: Connecting with Heaven & Earth.* This movement helps the stomach and spleen systems and is connected to the Earth element. The stomach and spleen systems are associated with the emotion of peace and groundedness (or its negative counterpart: anxiety and thinking). Movement 3 activates the triple heater, which is an

energy system that helps the internal organs, glands, and the lymph system. After Movement 2, the participants lower the hands to their sides and then move the hands up from both sides in the same way as they would hold a ball above their head. The hands are kept above the head during the entire duration of this movement. The participants inhale and bend the knees to lower the body slowly. As they exhale, they straighten their body. Participants focus on the emotion of peace and groundedness and on their body sensations.

*Movement 4: Connecting with Your Body's Energy.* This movement helps the lung system and is connected to the Metal element. The lung system associates with the emotion of contentment (and its negative counterpart: depression and sadness). Movement 4 directs energy to a point called Hui Yin at the center of the pelvic floor, ½ inch in front of the anus. This is where the female energy channels gather together. Performing this movement is beneficial for the reproductive organs in women and for prostate function in men. The participants bring both hands down and connect the tips of the fingers forming a heart shape in front of your navel. The participants keep a light pressure on the tips of the fingers to stimulate the heart energy. The participants bend the knees while keeping spine and shoulders relaxed and straight and then spread the legs slightly by moving the right foot half a step out. While participants inhale, they shift the body weight to the left, putting 70% of the weight on the left leg and holding this position for three seconds. As they exhale, they switch the body weight and put 70% of the weight on the right leg. They hold this position for three seconds. The participants

keep shifting their body weight in this way from side to side. During this movement, participants focus on the emotion of contentment and on their body sensations.

*Movement 5: Connecting with Your Heart's Energy.* This movement helps the kidney system and is connected to the Water element. The kidney system associates with the emotion of gratitude and thankfulness (and its negative counterpart: fear). Movement 5 helps to move energy to the Bai Hui point on the top of the head. The participants adjust their feet so they are standing with the feet shoulder width apart. They put the hands together palm to palm in front of the chest while keeping a light pressure on the fingertips to stimulate the heart energy. During the inhalation, the participants slowly bend forward at the waist. This is a small movement. With the exhale, the participants straighten back up. While doing this movement the participants focus on the emotion of gratitude and they remain aware of their body sensations.

*The Ending: Harvesting of Qi.* The participants rub the hands together, palm to palm and then massage the face and ears, comb through the hair, followed by cupping and tapping parts of the body. They then make gentle dolphin movements with the neck and body, and after more cupping, the practice ends by lifting and dropping the heels nine times.

Relevant to our study, these movements can be done lying or sitting or through kinesthetic imagery, and therefore, the Five Element Qigong Healing Movements are suitable for adults with SCI with paraplegia or tetraplegia. A Qigong Master from the Spring Forest Qigong™ center (Minnesota) will teach the introductory class (6h) online



and give specific instructions to adults with paraplegia and tetraplegia about the kinesthetic imagery of Qigong movements while focusing on breathing and body awareness.<sup>(18,24)</sup> During kinesthetic imagery, participants will be asked to imagine the feeling of their own body movements, rather than simply “visualizing” the movement. The participants will be instructed to actively move however much they comfortably can and imagine that they are performing the entire whole-body movement standing up. They will be instructed on focusing on how such a standing position would feel and to imagine the ‘feeling’ of the contact of the floor with the soles of their feet. If reproducing this feeling is difficult, participants will be asked to associate positive memories from before their SCI with whatever they imagine standing on – for example the memory of feeling the sand under the soles of the feet on the beach or the feeling of grass under the feet when standing barefoot in the garden. After the introductory class, the participants will receive a login and password to access the online video and practice at home.

### *2.7. Safety of the intervention*

Because of the low intensity movements or kinesthetic imagery used in Qigong, we anticipate that this trial will be safe and well-tolerated. Thus, we do not anticipate terminating the trial due to safety or tolerability issues.

### *2.8. Data collection and intervention procedures*

The scheduling of assessments, timeline, and duration of each study section is displayed in **Table 1**. After eConsenting, a study staff member will schedule a Zoom call

with the participants through the University of Minnesota's secure Zoom conference ability to acquire demographic information and general health history and screen participants for cognitive ability with the Mini-Mental State Examination-short version.<sup>(29)</sup> A Kinesthetic and Visual Imagery questionnaire<sup>(30)</sup> will assess if participants are able to imagine from the first-person perspective (kinesthetic imagery), since this type of imagery task will be used during the Qigong practice. We will enter the screening and behavioral assessment data into the password-protected University of Minnesota REDCap database with data monitoring to ensure data quality during data entry.

Then the participants will attend the introductory Five Elements Qigong Healing Movements class over Zoom. After the class, participants will receive a password protected website link to practice individually at home with the online video for 12 weeks, at least 3x/week, 41min/session. The Qigong website will automatically monitor the days and duration that videos are accessed, which allows us to objectively track adherence. The website administrators of the Spring Forest Qigong™ center will provide the weekly logs of all participants to the principal investigator. The participants will login through their ID code given at the start of the study so that no personal information is transmitted to the website or the center. Individual weekly check-ins will be organized over the phone, or occasionally over Zoom if additional demonstrations of Qigong movements are needed during the 12-week practice. During this weekly call, we will also record the use of opioids and/or other prescribed or over-the-counter pain medication, recent illnesses, health care utilization, and/or recent hospitalizations, and any activity that would indicate community integration. Qualitative information will also

be collected about their perceptions, opinions, and satisfaction with the Qigong practice and study.

Study staff will also organize Zoom calls to collect primary and secondary behavioral outcomes at four time points, i.e., at baseline, midway after 6 weeks of Qigong practice, at the end of the 12-week Qigong practice, and after a 6-week follow-up during which participants do not practice Qigong. These data will also be entered into REDCap.

During the 6-week follow-up period participants will receive standard of care and receive weekly phone calls to continue recording the weekly neuropathic pain intensity levels, use of opioids, and/or other prescribed or over-the-counter pain medication, recent illnesses, health care utilization, and/or recent hospitalizations, and any activity that would indicate community integration. Participants will receive \$100 upon study completion, delivered through the Greenphire ClinCard. The payment of the Qigong class and video access will be covered by the study as well.

Participants will be encouraged to complete all scheduled virtual visits and assessments. However, missed sessions will be allowed and recorded and will not be considered protocol deviations. Given that this study is being conducted during a highly contagious COVID-19 pandemic, we estimate 90% adherence and 30% attrition given a high likelihood that several participants will be exposed to the COVID-19 virus at some point during the study. If an assessment or weekly check-in is missed, care will be taken to get the information at a later time, perhaps in a one-on-one call or Zoom session. There are no stop criteria for missed sessions or missed testing. The study team will

decide when to consider a participant “lost to follow-up” based on clinical/scientific judgment on a case-by-case basis. Every attempt will be made to retain participants within the trial and proceed with mid or final assessments, even in the event of non-compliance or discontinuation of intervention. Missed testing sessions will be recorded for consideration during the analysis but will not be cause for removal from this study.

## *2.9. Outcome measures*

### *2.9.1 Primary outcome measure*

*2.9.1.1. Intensity of neuropathic pain in the prior week:* Our primary behavioral outcome—the highest, average, and lowest neuropathic pain intensity ratings perceived in the prior week— will be recorded using a 0-10 numerical rating scale with 0 being no pain and 10 the worst pain ever. This numerical pain rating scale has been recommended by the mission of the Initiative on Methods, Measurement, and Pain Assessment in Clinical Trials consensus group for use in pain clinical trials and by the 2006 National Institute on Disability and Rehabilitation Research SCI Pain outcome measures consensus group.<sup>(31,32)</sup> This scale is recommended to standardize pain outcomes across studies.

### *2.9.2 Secondary outcome measures*

*2.9.2.1. Location and impact of neuropathic pain; spasms frequency and severity:* Other pain data will be collected using the National Institute of Neurological Disorders-Common Data Elements International SCI Pain Basic Data Set Version 2.0.<sup>(33)</sup> This Data Set also assesses dimensions of pain (i.e., intensity of pain, location, etc.), and

how pain interferes with mood, activity, and sleep. The Brief Pain Inventory elicits self-report of pain intensity and its impact on functioning in the past 24h.<sup>(32)</sup> Spasms frequency and spasm severity will be evaluated with the Penn Spasm Frequency Scale.<sup>(34)</sup>

**2.9.2.2. Mood:** The Patient Health Questionnaire-9 is a 9-item scale that will be used to assess symptoms of depression.<sup>(35)</sup> It has been extensively used in adults with SCI.<sup>(36–39)</sup> The scale is well validated and has excellent psychometrics.<sup>(35,40,41)</sup> The State-Trait Anxiety Inventory is a self-report measure designed to assess the presence and severity of current symptoms of anxiety (State anxiety) and a generalized propensity to be anxious (Trait anxiety).<sup>(42)</sup>

**2.9.2.3. Quality of life:** The World Health Organization Quality of Life Instruments (abbreviated version) is a 26-item quality of life scale, used to assess physical and psychological health, social relationships and environment.<sup>(43)</sup> The scale has been used in adults with SCI and has good psychometric properties.<sup>(43–45)</sup> The Satisfaction with Life Scale is a 5-item scale that assesses patient happiness with current quality of life.<sup>(46)</sup> The Moorong Self-Efficacy Scale is a 16-item self-report scale with excellent psychometric properties used to assess self-efficacy related to everyday life activities, and is designed specifically for people with SCI.<sup>(47–49)</sup> The Pittsburgh Sleep Quality Index is a 9-item scale that assesses sleep quality.<sup>(50)</sup>

**2.9.2.4. Body awareness:** The Revised Body Awareness Rating Questionnaire is a 12-item scale that will be used to investigate how the pain or tension in the body is affecting participant's awareness and function in daily life (e.g., being comfortable when

lying down).<sup>(51)</sup> It is a feasible measurement of body awareness and demonstrates good internal consistency as well as high test-retest reliability.<sup>(51)</sup> The Postural Awareness Scale is designed to measure self-reported awareness of body posture in patients with chronic pain.<sup>(52)</sup> The Functional Appreciation Scale (7-item self-report) measures the level of appreciation, honor, and respect one has for the body for what it is capable of doing, extending beyond awareness of body functionality.<sup>(53)</sup> The Multidimensional Assessment of Interoceptive Awareness measures interoceptive body awareness.<sup>(54)</sup> The Body perception questionnaire-short form is a 46-item self-report of body awareness and experience of autonomic reactivity.<sup>(55,56)</sup> We will ask participants to self-report on their heart rhythm, blood pressure, perspiration, body temperature regulation, control of the bronchopulmonary system, bladder, bowel, and sexual function using the Autonomic Standards Assessment Form.<sup>(57)</sup>

*2.9.2.5. Function.* The Spinal Cord Injury Functional Index<sup>(58)</sup> measures functional performance across 5 domains: basic mobility, self-care, fine motor function, wheelchair mobility and/or ambulation. This scale yields scores that are sensitive to change across multiple distinct functional domains.<sup>(59)</sup> For the Patient Specific Functional Scale,<sup>(60)</sup> the participants will self-identify goals related to activities in daily life that are important to them. The participants will rate them at each time point between 0 (i.e., unable to do the activity without pain) and 10 (able to do the activity without pain). This is a valid measure to assess disability in individuals with chronic pain.<sup>(60)</sup> The Physical activity 3-day recall questionnaire is employed to ask participants to describe all activities performed during the past 3 days.<sup>(61,62)</sup>

*2.9.2.6. Fear of injury due to movement:* The Tampa Scale for Kinesiophobia will be used to assess fear of injury due to physical movement.<sup>(63)</sup> Respondents rate 17 items on a four-point Likert scale ranging from 1 (strongly disagree) to 4 (strongly agree). Responses are summed to create a total score ranging between 17 to 68, where higher scores indicate an increasing degree of kinesiophobia. Recent studies reinforce the Tampa Scale for Kinesiophobia's psychometric properties across various pain conditions, nationalities, and translations.<sup>(64)</sup>

*2.9.2.7. Community integration:* The Craig Handicap Assessment and Reporting Technique–Short Form is commonly used to provide an objective measure as to the degree by which a person with SCI remains with impairment or disability and can give an indication on community integration.<sup>(65)</sup> It measures several domains including: the type and level of daily assistance needed on both a physical and cognitive level (i.e., personal care, hygiene, decision making, communicating with others); level of physical activity (ranging from travel to daily mobility); transportation needs; how time is spent (i.e., employment, housekeeping, cooking, leisure activities); social interactions (including relatives, co-workers, and friends); and available financial resources.

## *2.10 Statistical analysis*

All analyses will be done using standard statistical software including SAS, Stata, and R. The data analysis from this feasibility study will provide an estimate of key trial elements to determine whether to proceed to a larger definitive RCT. Both Intent-to-Treat (ITT) and per-protocol (PP) analyses will be conducted, where ITT population is

defined as all participants that are enrolled in the study and PP population is defined as all participants who are enrolled and strictly adhere to the protocol. Descriptive statistics and percentages will be calculated for nominal and continuous demographic data and feasibility outcomes. The data will be transformed appropriately to ensure at least approximate normal distributions. Missing data will be handled using the multiple imputation and inverse probability weighting approaches.

For each of the primary and secondary endpoints, longitudinal models with mixed effects will be used to test the effect of Qigong practice on changes of pain and behavioral outcomes, which will include the subject-level effect, time, time-dependent treatment indicator as predictors as well as adjust for age, race, and other covariates as appropriate. Adults with SCI are heterogeneous in injury level, completeness, time since injury, age, and sex. The within-subject design is powerful as it eliminates variations due to between subject heterogeneity, though the success of Qigong may depend on injury levels and completeness. Thus, we will explore and describe these factors as potential confounders in the linear model.

The behavioral data will also be analyzed using a repeated measure ANOVA, with Tukey post-hoc tests to evaluate changes between each time point, or the Friedman test with non-parametric post-hoc tests if the data are not normally distributed.

### **3 Discussion**

About 50% Americans with SCI experience long-term debilitating neuropathic pain, interfering with daily life.<sup>(1)</sup> Available treatments provide insufficient pain relief.<sup>(2)</sup> Prior



research has proposed that the development and intensification of neuropathic pain after SCI is partly dependent on brain reorganization associated with dysfunctional multisensory integration processes, as well as distorted perception and representation of the body.<sup>(11–14)</sup> Mind and body approaches, such as Qigong, are known to train body awareness and reduce chronic pain, but evidence-based research on the use of mind and body approaches for SCI-related neuropathic pain is limited.<sup>(15–23)</sup>

Therefore, in this quasi-experimental study, we will test our hypothesis that Spring Forest Qigong™'s Five Element Qigong Healing Movements will reduce SCI-related neuropathic pain by improving body awareness. To our knowledge, this will be the first study using Qigong for neuropathic pain relief in adults with SCI. This study will provide preliminary evidence-based data on the feasibility of remotely delivered Qigong and whether Qigong practice reduces neuropathic pain, and as secondary outcomes, reduces spasms, improves functional performance, mood, or body awareness. We will use a comprehensive battery of assessments to explore symptoms commonly associated with SCI-related neuropathic pain. This Qigong practice offers multiple applications for broad use in the home or community because this practice can be provided remotely.

There are some limitations to this study. This quasi-experimental design will be conducted on a limited sample size and thus the results will need to be validated in a larger sample size and compared to a control group. The follow-up period is 6 weeks, which means that longer-term effects cannot be observed. Nevertheless, the data from

the present work will inform the design of future randomized controlled trials with adequate sample size, intervention dosage, and follow-up duration.

We will use our existing community connections at the University of Minnesota to disseminate information, spread awareness of Spring Forest Qigong and the results, and to hold dialogues with stakeholders. This will help us design future larger studies, strengthen our proposals for funding, and provide us with a platform to educate consumers, caregivers, and providers locally and nationally.

## Figure Legends

**Fig. 1.** Study flow chart

**Fig. 2.** Depiction of the Five Element Qigong Healing Movements from Spring Forest Qigong.

*Legend:* The five movements are presented from left to right. Movement 1: Moving of Yin and Yang; Movement 2: Breathing of the Universe; Movement 3: Connecting with Heaven & Earth; Movement 4: Connecting with Your Body's Energy; Movement 5: Connecting with Your Heart's Energy. Details of how the different movements are performed are presented in the text.

## REFERENCES

- (1) Spotlight: Improving Care for Veterans with Spinal Cord Injuries and Disorders 2006. <https://www.hsrd.research.va.gov/news/feature/sci.cfm?ID=1160> (accessed August 6, 2020).
- (2) Hatch MN, Cushing TR, Carlson GD, Chang EY. Neuropathic pain and SCI: Identification and treatment strategies in the 21st century. *J Neurol Sci* 2018;384:75–83.
- (3) Kramer JLK, Minhas NK, Jutzeler CR, Erin L K, Liu LJW, Ramer MS. Neuropathic pain following traumatic spinal cord injury: Models, measurement, and mechanisms. *Journal of Neuroscience Research* 2017;95:1295–306. <https://doi.org/10.1002/jnr.23881>.
- (4) Burke D, Fullen BM, Stokes D, Lennon O. Neuropathic pain prevalence following spinal cord injury: A systematic review and meta-analysis. *Eur J Pain* 2017;21:29–44.
- (5) Gibbs K, Beaufort A, Stein A, Leung TM, Sison C, Bloom O. Assessment of pain symptoms and quality of life using the International Spinal Cord Injury Data Sets in persons with chronic spinal cord injury. *Spinal Cord Ser Cases* 2019;5:32.
- (6) Solstrand Dahlberg L, Becerra L, Borsook D, Linnman C. Brain changes after spinal cord injury, a quantitative meta-analysis and review. *Neurosci Biobehav Rev* 2018;90:272–93.
- (7) Nees TA, Finnerup NB, Blesch A, Weidner N. Neuropathic pain after spinal cord injury: the impact of sensorimotor activity. *Pain* 2017;158:371–6.

- (8) Siddall PJ, Middleton JW. Spinal cord injury-induced pain: mechanisms and treatments. *Pain Manag* 2015;5:493–507.
- (9) Kaushal M, Oni-Orisan A, Chen G, Li W, Leschke J, Ward BD, et al. Evaluation of Whole-Brain Resting-State Functional Connectivity in Spinal Cord Injury: A Large-Scale Network Analysis Using Network-Based Statistic. *J Neurotrauma* 2017;34:1278–82.
- (10) Wang W, Xie W, Zhang Q, Liu L, Liu J, Zhou S, et al. Reorganization of the brain in spinal cord injury: a meta-analysis of functional MRI studies. *Neuroradiology* 2019. <https://doi.org/10.1007/s00234-019-02272-3>.
- (11) Leemhuis E, De Gennaro L, Pazzaglia AM. Disconnected Body Representation: Neuroplasticity Following Spinal Cord Injury. *J Clin Med Res* 2019;8. <https://doi.org/10.3390/jcm8122144>.
- (12) Lenggenhager B, Pazzaglia M, Scivoletto G, Molinari M, Aglioti SM. The sense of the body in individuals with spinal cord injury. *PLoS One* 2012;7:e50757.
- (13) Pozeg P, Palluel E, Ronchi R, Solcà M, Al-Khodairy A-W, Jordan X, et al. Virtual reality improves embodiment and neuropathic pain caused by spinal cord injury. *Neurology* 2017;89:1894–903.
- (14) Vastano R, Costantini M, Widerstrom-Noga E. Maladaptive reorganization following SCI: The role of body representation and multisensory integration. *Prog Neurobiol* 2022;208:102179.
- (15) Mehling WE, Wrubel J, Daubenmier JJ, Price CJ, Kerr CE, Silow T, et al. Body Awareness: a phenomenological inquiry into the common ground of mind-body

- therapies. *Philos Ethics Humanit Med* 2011;6:6.
- (16) Coleman JF. Spring Forest Qigong and chronic pain: making a difference. *J Holist Nurs* 2011;29:118–28; quiz 129–31.
- (17) Lynch M, Sawynok J, Hiew C, Marcon D. A randomized controlled trial of qigong for fibromyalgia. *Arthritis Res Ther* 2012;14:R178.
- (18) Klein P, Picard G, Baumgarden J, Schneider R. Meditative Movement, Energetic, and Physical Analyses of Three Qigong Exercises: Unification of Eastern and Western Mechanistic Exercise Theory. *Medicines (Basel)* 2017;4. <https://doi.org/10.3390/medicines4040069>.
- (19) Taylor SM, Cheung EO, Sun R, Grote V, Marchlewski A, Addington EL. Applications of complementary therapies during rehabilitation for individuals with traumatic Spinal Cord Injury: Findings from the SCIRehab Project. *J Spinal Cord Med* 2019;42:571–8.
- (20) Zou L, Zhang Y, Yang L, Loprinzi PD, Yeung AS, Kong J, et al. Are Mindful Exercises Safe and Beneficial for Treating Chronic Lower Back Pain? A Systematic Review and Meta-Analysis of Randomized Controlled Trials. *J Clin Med Res* 2019;8. <https://doi.org/10.3390/jcm8050628>.
- (21) Phattharasupharerk S, Purepong N, Eksakulkla S, Siriphorn A. Effects of Qigong practice in office workers with chronic non-specific low back pain: A randomized control trial. *J Bodyw Mov Ther* 2019;23:375–81.
- (22) Curtis K, Hitzig SL, Bechsgaard G, Stoliker C, Alton C, Saunders N, et al. Evaluation of a specialized yoga program for persons with a spinal cord injury: a

- pilot randomized controlled trial. *J Pain Res* 2017;10:999–1017.
- (23) Shem K, Karasik D, Carufel P, Kao M-C, Zheng P. Seated Tai Chi to alleviate pain and improve quality of life in individuals with spinal cord disorder. *J Spinal Cord Med* 2016;39:353–8.
- (24) Kuan S-C, Chen K-M, Wang C. Effectiveness of Qigong in Promoting the Health of Wheelchair-Bound Older Adults in Long-Term Care Facilities. *Biological Research For Nursing* 2012;14:139–46. <https://doi.org/10.1177/1099800411399645>.
- (25) Home Page - NSCISC Application n.d.  
<https://www.nscisc.uab.edu/Public/Facts%20and%20Figures%20-%202021.pdf>  
(accessed August 6, 2021).
- (26) Data by Topic: Age, Race & Ethnicity n.d. <https://www.census.gov/quickfacts/MN>  
(accessed August 6, 2021).
- (27) Van de Winckel A, Tseng Y-T, Chantigian D, Lorant K, Zarandi Z, Buchanan J, et al. Age-Related Decline of Wrist Position Sense and its Relationship to Specific Physical Training. *Front Hum Neurosci* 2017;11:570.
- (28) Spring Forest Qigong Courses - Five Element Healing Movements n.d.  
<https://www.springforestqigong.com/shop/healing-tools-courses/five-element-healing-movements-store> (accessed February 10, 2022).
- (29) Folstein MF, Folstein SE, McHugh PR. “Mini-mental state”: a practical method for grading the cognitive state of patients for the clinician. *J Psychiatr Res* 1975;12:189–98.
- (30) Malouin F, Richards CL, Jackson PL, Lafleur MF, Durand A, Doyon J. The

- Kinesthetic and Visual Imagery Questionnaire (KVIQ) for assessing motor imagery in persons with physical disabilities: a reliability and construct validity study. *J Neurol Phys Ther* 2007;31:20–9.
- (31) Dworkin RH, Turk DC, Farrar JT, Haythornthwaite JA, Jensen MP, Katz NP, et al. Core outcome measures for chronic pain clinical trials: IMMPACT recommendations. *Pain* 2005;113:9–19.
- (32) Bryce TN, Budh CN, Cardenas DD, Dijkers M, Felix ER, Finnerup NB, et al. Pain after spinal cord injury: an evidence-based review for clinical practice and research. Report of the National Institute on Disability and Rehabilitation Research Spinal Cord Injury Measures meeting. *J Spinal Cord Med* 2007;30:421–40.
- (33) Widerström-Noga E, Biering-Sørensen F, Bryce TN, Cardenas DD, Finnerup NB, Jensen MP, et al. The International Spinal Cord Injury Pain Basic Data Set (version 2.0). *Spinal Cord* 2014;52:282–6.
- (34) Mills PB, Vakil AP, Phillips C, Kei L, Kwon BK. Intra-rater and inter-rater reliability of the Penn Spasm Frequency Scale in People with chronic traumatic spinal cord injury. *Spinal Cord* 2018;56:569–74.
- (35) Kroenke K, Spitzer RL, Williams JB. The PHQ-9: validity of a brief depression severity measure. *J Gen Intern Med* 2001;16:606–13.
- (36) Fann JR, Bombardier CH, Richards JS, Tate DG, Wilson CS, Temkin N, et al. Depression after spinal cord injury: comorbidities, mental health service use, and adequacy of treatment. *Arch Phys Med Rehabil* 2011;92:352–60.
- (37) Krause JS, Reed KS, McArdle JJ. Factor Structure and Predictive Validity of



- Somatic and Nonsomatic Symptoms From the Patient Health Questionnaire-9: A Longitudinal Study After Spinal Cord Injury. *Archives of Physical Medicine and Rehabilitation* 2010;91:1218–24. <https://doi.org/10.1016/j.apmr.2010.04.015>.
- (38) Bombardier CH, Richards JS, Krause JS, Tulsy D, Tate DG. Symptoms of major depression in people with spinal cord injury: implications for screening. *Arch Phys Med Rehabil* 2004;85:1749–56.
- (39) Krause JS, Saunders LL, Reed KS, Coker J, Zhai Y, Johnson E. Comparison of the Patient Health Questionnaire and the Older Adult Health and Mood Questionnaire for self-reported depressive symptoms after spinal cord injury. *Rehabil Psychol* 2009;54:440–8.
- (40) Spitzer RL, Kroenke K, Williams JBW. Group, at PHQPCS (1999). Validation and utility of a self-report version of PRIME-MD. *JAMA* n.d.;282:1737–44.
- (41) Martin A, Rief W, Klaiberg A, Braehler E. Validity of the Brief Patient Health Questionnaire Mood Scale (PHQ-9) in the general population. *Gen Hosp Psychiatry* 2006;28:71–7.
- (42) Julian LJ. Measures of anxiety: State-Trait Anxiety Inventory (STAI), Beck Anxiety Inventory (BAI), and Hospital Anxiety and Depression Scale-Anxiety (HADS-A). *Arthritis Care & Research* 2011;63:S467–72. <https://doi.org/10.1002/acr.20561>.
- (43) Lin M-R, Hwang H-F, Chen C-Y, Chiu W-T. Comparisons of the Brief Form of the World Health Organization Quality of Life and Short Form-36 for Persons With Spinal Cord Injuries. *American Journal of Physical Medicine & Rehabilitation* 2007;86:104–13. <https://doi.org/10.1097/01.phm.0000247780.64373.0e>.

- (44) Jang Y, Hsieh C-L, Wang Y-H, Wu Y-H. A validity study of the WHOQOL-BREF assessment in persons with traumatic spinal cord injury. *Arch Phys Med Rehabil* 2004;85:1890–5.
- (45) Hill MR, Noonan VK, Sakakibara BM, Miller WC, SCIRE Research Team. Quality of life instruments and definitions in individuals with spinal cord injury: a systematic review. *Spinal Cord* 2010;48:438–50.
- (46) Diener E, Emmons RA, Larsen RJ, Griffin S. The Satisfaction With Life Scale. *Journal of Personality Assessment* 1985;49:71–5.  
[https://doi.org/10.1207/s15327752jpa4901\\_13](https://doi.org/10.1207/s15327752jpa4901_13).
- (47) Middleton JW, Tran Y, Lo C, Craig A. Reexamining the Validity and Dimensionality of the Moorong Self-Efficacy Scale: Improving Its Clinical Utility. *Arch Phys Med Rehabil* 2016;97:2130–6.
- (48) Middleton JW, Tate RL, Geraghty TJ. Self-Efficacy and Spinal Cord Injury: Psychometric Properties of a New Scale. *Rehabil Psychol* 2003;48:281–8.
- (49) Miller SM. The measurement of self-efficacy in persons with spinal cord injury: psychometric validation of the moorong self-efficacy scale. *Disabil Rehabil* 2009;31:988–93.
- (50) Buysse DJ, Reynolds CF 3rd, Monk TH, Berman SR, Kupfer DJ. The Pittsburgh Sleep Quality Index: a new instrument for psychiatric practice and research. *Psychiatry Res* 1989;28:193–213.
- (51) Dragesund T, Strand LI, Grotle M. The Revised Body Awareness Rating Questionnaire: Development into a Unidimensional Scale Using Rasch Analysis.

Phys Ther 2018;98:122–32.

- (52) Cramer H, Mehling WE, Saha FJ, Dobos G, Lauche R. Postural awareness and its relation to pain: validation of an innovative instrument measuring awareness of body posture in patients with chronic pain. *BMC Musculoskelet Disord* 2018;19:109.
- (53) Alleva JM, Tylka TL, Kroon Van Diest AM. The Functionality Appreciation Scale (FAS): Development and psychometric evaluation in U.S. community women and men. *Body Image* 2017;23:28–44.
- (54) Mehling WE, Price C, Daubenmier JJ, Acree M, Bartmess E, Stewart A. The Multidimensional Assessment of Interoceptive Awareness (MAIA). *PLoS One* 2012;7:e48230.
- (55) Porges S. Body perception questionnaire: Laboratory of Developmental Assessment University of Maryland. *Pridobljeno* 1993;15:2009.
- (56) Cabrera A, Kolacz J, Pailhez G, Bulbena-Cabre A, Bulbena A, Porges SW. Assessing body awareness and autonomic reactivity: Factor structure and psychometric properties of the Body Perception Questionnaire-Short Form (BPQ-SF). *Int J Methods Psychiatr Res* 2017. <https://doi.org/10.1002/mpr.1596>.
- (57) Krassioukov A, Biering-Sørensen F, Donovan W, Kennelly M, Kirshblum S, Krogh K, et al. International standards to document remaining autonomic function after spinal cord injury. *J Spinal Cord Med* 2012;35:201–10.
- (58) Slavin MD, Ni P, Tulskey DS, Kisala PA, Heinemann AW, Charlifue S, et al. Spinal Cord Injury–Functional Index/Assistive Technology Short Forms. *Arch Phys Med*

Rehabil 2016;97:1745–52.e7.

- (59) Keeney T, Slavin M, Kisala P, Ni P, Heinemann AW, Charlifue S, et al. Sensitivity of the SCI-FI/AT in Individuals with Traumatic Spinal Cord Injury. *Arch Phys Med Rehabil* 2018;99:1783–8.
- (60) Westaway MD, Stratford PW, Binkley JM. The patient-specific functional scale: validation of its use in persons with neck dysfunction. *J Orthop Sports Phys Ther* 1998;27:331–8.
- (61) Jörgensen S, Martin Ginis KA, Lexell J. Leisure time physical activity among older adults with long-term spinal cord injury. *Spinal Cord* 2017;55:848–56.
- (62) Martin Ginis KA, Phang SH, Latimer AE, Arbour-Nicitopoulos KP. Reliability and Validity Tests of the Leisure Time Physical Activity Questionnaire for People with Spinal Cord Injury. *Arch Phys Med Rehabil* 2012;93:677–82.
- (63) Kori SH, Miller RP, Todd DD. Kinesiophobia: A new view of chronic pain behavior. *Pain Management* 1990:35–43.
- (64) Roelofs J, van Breukelen G, Sluiter J, Frings-Dresen MHW, Goossens M, Thibault P, et al. Norming of the Tampa Scale for Kinesiophobia across pain diagnoses and various countries. *Pain* 2011;152:1090–5.
- (65) Whiteneck GG, Charlifue SW, Gerhart KA, Overholser JD, Richardson GN. Quantifying handicap: a new measure of long-term rehabilitation outcomes. *Arch Phys Med Rehabil* 1992;73:519–26.

# Study Design

**1. Screen and consent adults with SCI-related neuropathic pain and with paraplegia or tetraplegia**

**Excluded** (state reason)

**2. Baseline behavioral assessments over Zoom**

**3. Qigong practice**  
12 weeks, 3x/week,  
41min/session with online  
video + weekly follow-up on  
neuropathic pain intensity

**Withdrawal/drop-out/adverse  
event** (state reason)

**4. Mid-practice behavioral assessments over Zoom  
(6 weeks of Qigong practice)**

**5. End of practice behavioral assessments over Zoom  
(12 weeks of Qigong practice)**

**6. 6-weeks Follow-up**  
No Qigong practice +  
weekly follow-up on  
neuropathic pain intensity

**7. End of study behavioral assessments over Zoom**

**8. Statistical analysis**

# 5 Elements

QIGONG FOR SELF HEALING

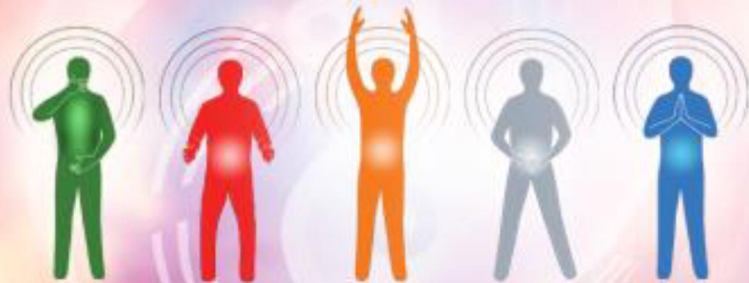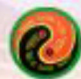

SPRING FOREST  
QIGONG
